# Supplementary material for: Design and synergistic effect of nano-sized epoxy-NiCo2O4nanocomposites for anticorrosion applications
Source: Royal Society of Chemistry journal article supplement (doi:10.1039/d2ra01773c), 2022-01-01
Supplement: d2ra01773c1.pdf [file d2ra01773c1.pdf]

## Design and synergistic effect of nano-sized epoxy-NiCo<sub>2</sub>O<sub>4</sub> nanocomposites for anticorrosion applications

M. Swathika<sup>1</sup>, Kshitij RB Singh<sup>2</sup>, M. Mehala<sup>1</sup>, Sadanand Pandey<sup>3</sup>, Jay Singh<sup>2</sup>, Ravindra Pratap Singh<sup>\*4</sup>, Arunadevi Natarajan<sup>\*,1</sup>

<sup>1</sup>Department of Chemistry, PSGR Krishnammal College for Women, Coimbatore, Tamil Nadu (641004), India

<sup>2</sup>Department of Chemistry, Institute of Science, Banaras Hindu University, Varanasi, Uttar Pradesh (221005), India

<sup>3</sup>Department of Chemistry, College of Natural Science, Yeungnam University, 280 Daehak-Ro, Gyeongsan, Gyeongbuk (38541), Republic of Korea

<sup>4</sup>Department of Biotechnology, Indira Gandhi National Tribal University, Amarkantak, Madhya Pradesh (484887), India

### \*Corresponding Authors

Ravindra Pratap Singh ([rpsnpl69@gmail.com](mailto:rpsnpl69@gmail.com), [ravindra.singh@igntu.ac.in](mailto:ravindra.singh@igntu.ac.in)) and N. Arunadevi ([arunadevi@psgrkcw.ac.in](mailto:arunadevi@psgrkcw.ac.in)).

| <b>Table S1</b> <i>Analytical chemical composition of mild steel (Wt %)</i> |           |          |          |           |           |           |           |           |          |
|-----------------------------------------------------------------------------|-----------|----------|----------|-----------|-----------|-----------|-----------|-----------|----------|
| <b>Metal</b>                                                                | <b>Fe</b> | <b>C</b> | <b>P</b> | <b>Mn</b> | <b>Si</b> | <b>Cr</b> | <b>Mo</b> | <b>Al</b> | <b>S</b> |
| <b>Compositions</b>                                                         | Rem.      | 0.078    | 0.026    | 0.019     | 0.004     | 0.02      | 0.0009    | 0.004     | 0.02     |

| <b>Table S2</b> <i>IR data of ligand and complex</i> |                                     |                                      |
|------------------------------------------------------|-------------------------------------|--------------------------------------|
| <b>Assignments<br/>(cm<sup>-1</sup>)</b>             | <b>Ligand<br/>(cm<sup>-1</sup>)</b> | <b>Complex<br/>(cm<sup>-1</sup>)</b> |
| $\nu$ (-OH)                                          | 3316                                | 3321                                 |
| $\nu$ (N-N)                                          | 1035                                | 1074                                 |
| $\nu_{\text{asym}}$ (C=O)                            | 1616                                | 1631                                 |
| $\nu_{\text{asym}}$ (C=O)                            | 1398                                | 1348                                 |
| $\nu_{\text{asy}} - \nu_{\text{sym}}$                | 218                                 | 283                                  |
| $\nu$ (C=N)                                          | 1258                                | 1203                                 |
| $\nu$ (-NH)                                          | 3244                                | 3211                                 |
| $\nu$ (M-O)                                          | -                                   | 461<br>504                           |

**Table S3** *XRD data of metal oxide*

| <b>2<math>\theta</math> degree</b> | <b>hkl values</b> |
|------------------------------------|-------------------|
| 31.77                              | 111 - NiO         |
| 34.53                              | 220 - CoO         |
| 36.26                              | 311 - CoO         |
| 37.36                              | 222 - CoO         |
| 42.02                              | 200 - NiO         |
| 45.44                              | 400 - CoO         |
| 56.21                              | 422 - CoO         |
| 60.01                              | 511 - CoO         |
| 65.77                              | 440 - CoO         |
| 74.09                              | 621 -NiO          |
| 77.04                              | 533 - CoO         |
| 79.48                              | 622 - NiO         |

**Table S4** Corrosion parameters of mild steel solution in presence and absence of epoxy resin- Ligand/NiO-CoO at different temperatures (303±K - 333±K)

| Inhibition concentration              | Temperature (K) | Epoxy-L         |                          |       | Epoxy -NiCo <sub>2</sub> O <sub>4</sub> |                          |       |
|---------------------------------------|-----------------|-----------------|--------------------------|-------|-----------------------------------------|--------------------------|-------|
|                                       |                 | Weight loss (g) | Corrosion Rate (mm/year) | % IE  | Weight loss (g)                         | Corrosion Rate (mm/year) | % IE  |
| HCl                                   | 303             | 0.0678          | 37.04                    | -     | 230                                     | 125.65                   | -     |
|                                       | 313             | 0.0995          | 54.36                    | -     | 651                                     | 355.66                   | -     |
|                                       | 323             | 0.274           | 149.69                   | -     | 854                                     | 466.56                   | -     |
|                                       | 333             | 0.428           | 233.83                   | -     | 979                                     | 534.85                   | -     |
| HCl+0.05g                             | 303             | 0.018           | 9.83                     | 73.45 | 0.019                                   | 10.38                    | 91.74 |
|                                       | 313             | 0.037           | 20.21                    | 62.81 | 0.134                                   | 73.21                    | 79.42 |
|                                       | 323             | 0.122           | 66.65                    | 55.47 | 0.322                                   | 175.92                   | 62.30 |
|                                       | 333             | 0.401           | 219.08                   | 6.31  | 0.598                                   | 326.70                   | 38.92 |
| HCl+0.4g                              | 303             | 0.011           | 6.01                     | 83.78 | 0.011                                   | 6.01                     | 95.22 |
|                                       | 313             | 0.047           | 25.68                    | 52.76 | 0.178                                   | 97.25                    | 72.66 |
|                                       | 323             | 0.139           | 75.94                    | 49.27 | 0.388                                   | 211.97                   | 54.57 |
|                                       | 333             | 0.328           | 179.19                   | 23.36 | 0.524                                   | 286.27                   | 46.48 |
| HCl+0.8g                              | 303             | 0.028           | 15.30                    | 58.70 | 0.056                                   | 30.59                    | 75.65 |
|                                       | 313             | 0.048           | 26.22                    | 51.76 | 0.278                                   | 151.88                   | 57.30 |
|                                       | 323             | 0.152           | 83.04                    | 44.53 | 0.472                                   | 257.87                   | 44.73 |
|                                       | 333             | 0.322           | 175.92                   | 24.77 | 0.0871                                  | 47.58                    | 91.10 |
| H <sub>2</sub> SO <sub>4</sub> -      | 303             | 0.148           | 80.86                    | -     | 0.0871                                  | 47.58                    | -     |
|                                       | 313             | 0.238           | 130.03                   | -     | 0.189                                   | 103.26                   | -     |
|                                       | 323             | 0.341           | 186.30                   | -     | 0.269                                   | 146.96                   | -     |
|                                       | 333             | 0.477           | 260.60                   | -     | 0.483                                   | 263.88                   | -     |
| H <sub>2</sub> SO <sub>4</sub> +0.05g | 303             | 0.019           | 10.38                    | 87.16 | 0.0101                                  | 5.52                     | 88.40 |
|                                       | 313             | 0.109           | 59.55                    | 54.20 | 0.0558                                  | 30.48                    | 70.48 |
|                                       | 323             | 0.278           | 151.88                   | 18.48 | 0.187                                   | 102.16                   | 30.48 |

|                                          |     |        |        |       |        |        |       |
|------------------------------------------|-----|--------|--------|-------|--------|--------|-------|
|                                          | 333 | 0.418  | 228.36 | 12.37 | 0.421  | 230.00 | 12.84 |
| <b>H<sub>2</sub>SO<sub>4</sub>+0.4g</b>  | 303 | 0.028  | 15.30  | 81.08 | 0.0282 | 15.41  | 67.62 |
|                                          | 313 | 0.099  | 54.09  | 58.40 | 0.074  | 40.43  | 60.85 |
|                                          | 323 | 0.252  | 137.67 | 26.10 | 0.156  | 85.23  | 42.01 |
|                                          | 333 | 0.397  | 216.89 | 16.77 | 0.367  | 200.50 | 24.02 |
| <b>H<sub>2</sub>SO<sub>4</sub>+0.8g</b>  | 303 | 0.048  | 26.22  | 67.57 | 0.005  | 2.73   | 94.26 |
|                                          | 313 | 0.112  | 61.19  | 52.94 | 0.073  | 39.88  | 61.38 |
|                                          | 323 | 0.254  | 138.77 | 25.51 | 0.158  | 86.32  | 41.26 |
|                                          | 333 | 0.389  | 212.52 | 18.45 | 0.339  | 185.20 | 29.81 |
| <b>H<sub>3</sub>PO<sub>4</sub></b>       | 303 | 0.0772 | 42.18  | -     | 0.0686 | 37.48  | -     |
|                                          | 313 | 0.0921 | 50.32  | -     | 0.297  | 162.26 | -     |
|                                          | 323 | 0.157  | 85.77  | -     | 0.439  | 239.84 | -     |
|                                          | 333 | 0.241  | 131.66 | -     | 0.687  | 375.33 | -     |
| <b>H<sub>3</sub>PO<sub>4</sub>+0.05g</b> | 303 | 0.0312 | 17.05  | 59.59 | 0.0007 | 0.38   | 98.98 |
|                                          | 313 | 0.0487 | 26.61  | 47.12 | 0.137  | 74.85  | 53.87 |
|                                          | 323 | 0.129  | 70.48  | 17.83 | 0.321  | 175.37 | 26.88 |
|                                          | 333 | 0.222  | 121.28 | 7.88  | 0.611  | 333.80 | 11.06 |
| <b>H<sub>3</sub>PO<sub>4</sub>+0.4g</b>  | 303 | 0.011  | 6.01   | 85.75 | 0.0152 | 8.30   | 77.84 |
|                                          | 313 | 0.069  | 37.70  | 25.08 | 0.187  | 102.16 | 37.04 |
|                                          | 323 | 0.127  | 69.38  | 19.11 | 0.354  | 193.40 | 19.36 |
|                                          | 333 | 0.214  | 116.91 | 11.20 | 0.577  | 315.23 | 16.01 |
| <b>H<sub>3</sub>PO<sub>4</sub>+0.8g</b>  | 303 | 0.0228 | 12.46  | 70.47 | 0.0101 | 5.52   | 85.28 |
|                                          | 313 | 0.042  | 22.95  | 54.40 | 0.123  | 67.20  | 58.59 |
|                                          | 323 | 0.102  | 55.73  | 35.03 | 0.267  | 145.87 | 39.18 |
|                                          | 333 | 0.198  | 108.17 | 17.84 | 0.551  | 301.03 | 19.80 |

| <b>Table S5</b> <i>The correlation coefficient (<math>R^2</math>) value obtained from adsorption isotherm with epoxy resin-Ligand/NiO-CoO</i> |                                |                            |                   |                |               |
|-----------------------------------------------------------------------------------------------------------------------------------------------|--------------------------------|----------------------------|-------------------|----------------|---------------|
| <b>Compound Inhibitor</b>                                                                                                                     |                                | <b>Adsorption Isotherm</b> |                   |                |               |
|                                                                                                                                               |                                | <b>Langmuir</b>            | <b>Freundlich</b> | <b>Frumkin</b> | <b>Temkin</b> |
| <b>Epoxy-L</b>                                                                                                                                | HCl                            | 0.98                       | 0.98              | 0.92           | 0.88          |
|                                                                                                                                               | H <sub>2</sub> SO <sub>4</sub> | 0.97                       | 0.98              | 0.99           | 0.91          |
|                                                                                                                                               | H <sub>3</sub> PO <sub>4</sub> | 0.98                       | 0.97              | 0.78           | 0.71          |
| <b>Epoxy -NiCo<sub>2</sub>O<sub>4</sub></b>                                                                                                   | HCl                            | 0.99                       | 0.99              | 0.89           | 0.97          |
|                                                                                                                                               | H <sub>2</sub> SO <sub>4</sub> | 0.99                       | 0.98              | 0.88           | 0.98          |
|                                                                                                                                               | H <sub>3</sub> PO <sub>4</sub> | 0.99                       | 0.97              | 0.66           | 0.68          |

| <b>Table S6</b> <i>Thermodynamic parameters obtained for the epoxy resin-Ligand/NiO-CoO</i> |                                             |                                   |
|---------------------------------------------------------------------------------------------|---------------------------------------------|-----------------------------------|
| <b>Inhibitor</b>                                                                            | <b>Compound</b>                             | <b>Langmuir</b>                   |
|                                                                                             |                                             | $\Delta G^{\circ}_{ads}$ (kJ/mol) |
| <b>HCl</b>                                                                                  | <b>Epoxy-L</b>                              | -19.80                            |
|                                                                                             | <b>Epoxy -NiCo<sub>2</sub>O<sub>4</sub></b> | -17.17                            |
| <b>H<sub>2</sub>SO<sub>4</sub></b>                                                          | <b>Epoxy-L</b>                              | -18.16                            |
|                                                                                             | <b>Epoxy -NiCo<sub>2</sub>O<sub>4</sub></b> | -18.35                            |
| <b>H<sub>3</sub>PO<sub>4</sub></b>                                                          | <b>Epoxy-L</b>                              | -18.55                            |
|                                                                                             | <b>Epoxy -NiCo<sub>2</sub>O<sub>4</sub></b> | -15.64                            |

**Table S7 Tafel polarization at various concentrations**

| Inhibitor                             | Epoxy-L              |                |                        |                                         |        | Epoxy -NiCo <sub>2</sub> O <sub>4</sub> |                |                        |                                         |        |
|---------------------------------------|----------------------|----------------|------------------------|-----------------------------------------|--------|-----------------------------------------|----------------|------------------------|-----------------------------------------|--------|
|                                       | Tafelslopes (mV/dec) |                | E <sub>corr</sub> (mV) | I <sub>corr</sub> (μA/cm <sup>2</sup> ) | IE (%) | Tafelslopes (mV/dec)                    |                | E <sub>corr</sub> (mV) | I <sub>corr</sub> (μA/cm <sup>2</sup> ) | IE (%) |
|                                       | b <sub>a</sub>       | b <sub>c</sub> |                        |                                         |        | b <sub>a</sub>                          | b <sub>c</sub> |                        |                                         |        |
| HCl                                   | 222                  | 135            | -567                   | 347                                     |        | 315                                     | 132            | -642                   | 712                                     |        |
| HCl+0.05g                             | 192                  | 122            | -551                   | 291                                     | 33.2   | 219                                     | 127            | -539                   | 857                                     | 60.8   |
| HCl+0.4g                              | 182                  | 109            | -510                   | 129                                     | 79.8   | 142                                     | 119            | -512                   | 522                                     | 80.2   |
| HCl+0.8g                              | 147                  | 101            | -430                   | 119                                     | 89.3   | 139                                     | 101            | -403                   | 119                                     | 90.8   |
| H <sub>2</sub> SO <sub>4</sub>        | 212                  | 151            | -555                   | 254                                     |        | 298                                     | 122            | -623                   | 592                                     |        |
| H <sub>2</sub> SO <sub>4</sub> +0.05g | 168                  | 136            | -452                   | 247                                     | 30.1   | 251                                     | 115            | -521                   | 397                                     | 56.8   |
| H <sub>2</sub> SO <sub>4</sub> +0.4g  | 149                  | 119            | -439                   | 144                                     | 69.2   | 174                                     | 105            | -422                   | 254                                     | 79.2   |
| H <sub>2</sub> SO <sub>4</sub> +0.8g  | 131                  | 95             | -413                   | 124                                     | 77.8   | 160                                     | 87             | -402                   | 111                                     | 82.7   |
| H <sub>3</sub> PO <sub>4</sub>        | 398                  | 197            | -512                   | 423                                     |        | 435                                     | 169            | -498                   | 687                                     |        |
| H <sub>3</sub> PO <sub>4</sub> +0.05g | 221                  | 183            | -417                   | 328                                     | 20.9   | 357                                     | 138            | -439                   | 491                                     | 40.8   |
| H <sub>3</sub> PO <sub>4</sub> +0.4g  | 210                  | 150            | -302                   | 219                                     | 58.6   | 258                                     | 118            | -401                   | 357                                     | 60.5   |
| H <sub>3</sub> PO <sub>4</sub> +0.8g  | 100                  | 117            | -221                   | 123                                     | 60.3   | 189                                     | 109            | -312                   | 216                                     | 75.1   |

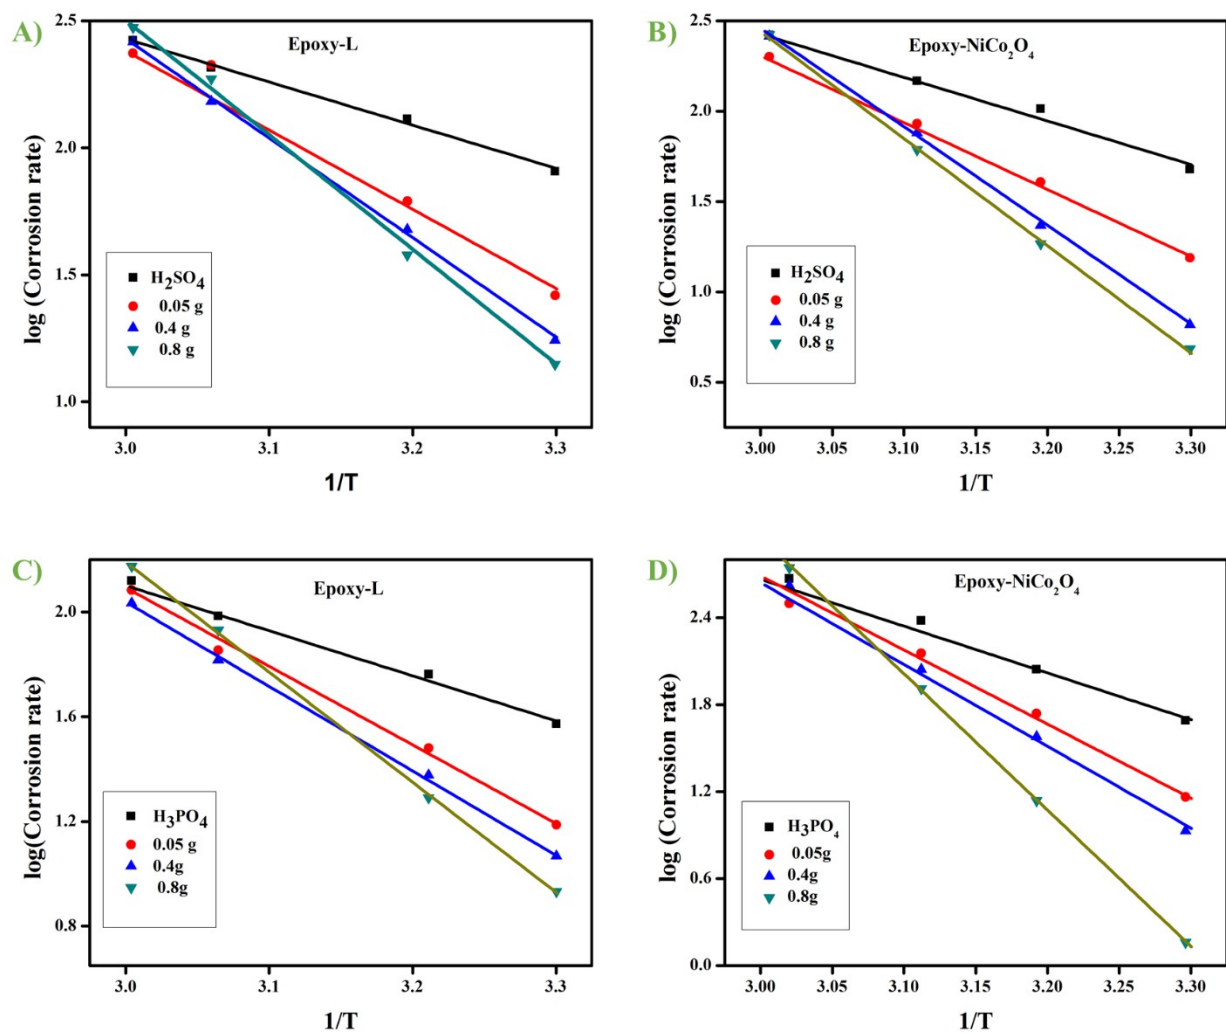

**Figure S1** Corrosion rate in mild steel: Arrhenius plots with H<sub>2</sub>SO<sub>4</sub>- **A)** epoxy -L and **B)** epoxy-NiCo<sub>2</sub>O<sub>4</sub>; with H<sub>3</sub>PO<sub>4</sub>- **C)** epoxy -L and **D)** epoxy-NiCo<sub>2</sub>O<sub>4</sub>.



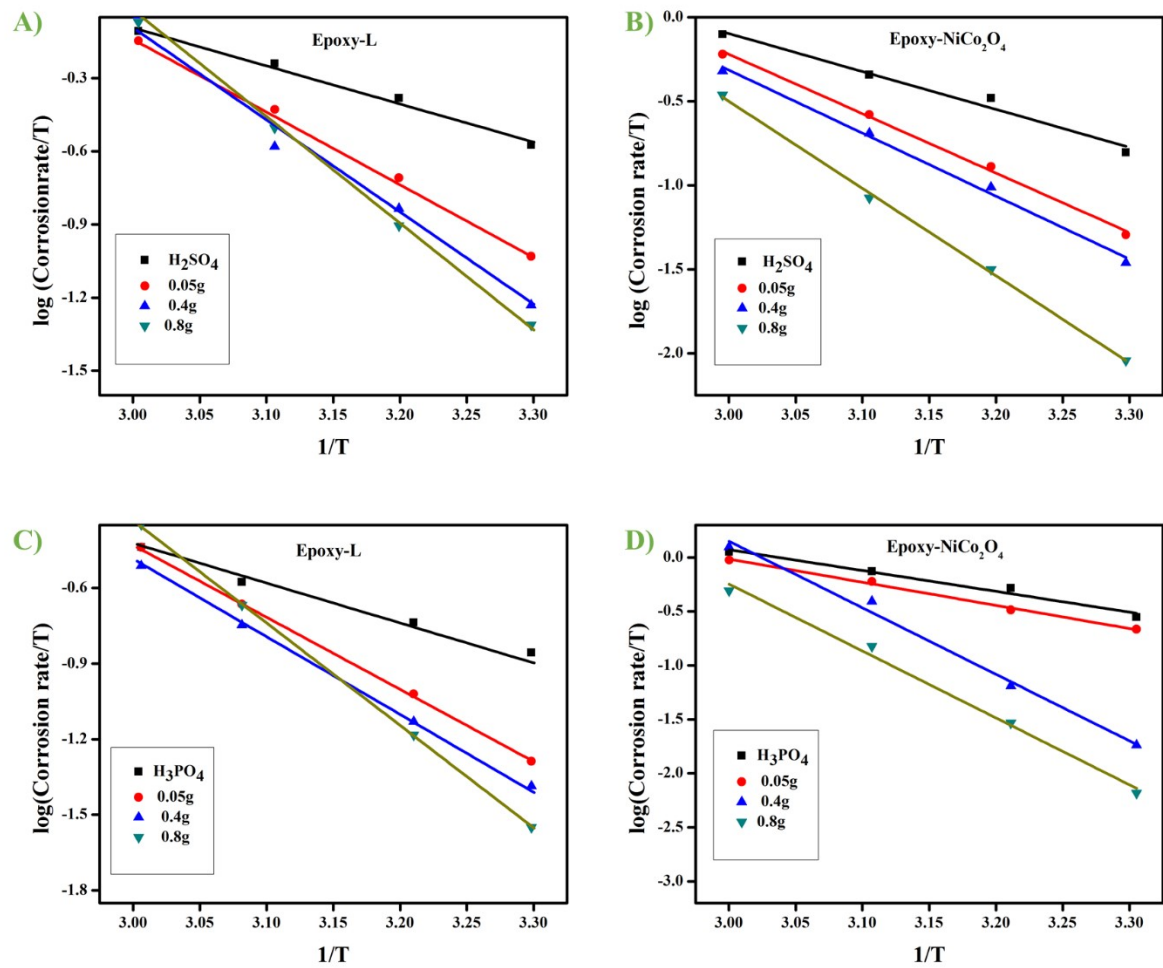

**Figure S2** Corrosion rate in mild steel: Transition plot with  $\text{H}_2\text{SO}_4$ - A) epoxy -L and B) epoxy- $\text{NiCo}_2\text{O}_4$ ; with  $\text{H}_3\text{PO}_4$ - C) epoxy -L and D) epoxy- $\text{NiCo}_2\text{O}_4$ .
